# Supplementary material for: Combining ab initio and ab initio molecular dynamics simulations to predict the complex refractive indices of organic polymers
Source: Royal Society of Chemistry journal article supplement (doi:10.1039/d2cp04768c), 2023-01-01
Supplement: d2cp04768c1.pdf [file d2cp04768c1.pdf]

### Supplementary Material for

## Combining *ab initio* and *ab initio* molecular dynamics simulations to predict the complex refractive index of organic polymers

Chengchao Wang, Xiaoning Li, Linhua Liu

Table S1 Polarizability and refractive index of PVC

| $n$  | $\alpha_{\text{ORCA}}$<br>(bohr <sup>3</sup> ) | $N$<br>( $\times 10^{28} \text{ m}^{-3}$ ) | $n_r$  | $\alpha_{\text{linear}}$<br>(bohr <sup>3</sup> ) | $n_{r_{\text{linear}}}$ | Relative<br>difference | $\alpha_{\text{PPFS}}$<br>(bohr <sup>3</sup> ) | $n_{r_{\text{PPFS}}}$ | Relative<br>difference |
|------|------------------------------------------------|--------------------------------------------|--------|--------------------------------------------------|-------------------------|------------------------|------------------------------------------------|-----------------------|------------------------|
| 1    | 37.7160                                        | 1.3137E+00                                 | 1.5272 | 34.1023                                          | 1.4676                  | 5.96E-02               | 37.7160                                        | 1.5266                | 6.43E-04               |
| 2    | 72.7963                                        | 6.6724E-01                                 | 1.5149 | 70.5563                                          | 1.4956                  | 1.93E-02               | 72.7963                                        | 1.5143                | 6.25E-04               |
| 3    | 107.5668                                       | 4.4719E-01                                 | 1.5090 | 107.0103                                         | 1.5053                  | 3.73E-03               | 107.5668                                       | 1.5084                | 6.15E-04               |
| 4    | 143.8035                                       | 3.3628E-01                                 | 1.5122 | 143.4643                                         | 1.5102                  | 2.05E-03               | 141.2306                                       | 1.5008                | 1.14E-02               |
| 5    | 179.6527                                       | 2.6946E-01                                 | 1.5128 | 179.9183                                         | 1.5131                  | 2.78E-04               | 177.7549                                       | 1.5058                | 7.03E-03               |
| 10   | 358.9473                                       | 1.3516E-01                                 | 1.5142 | 362.1883                                         | 1.5191                  | 4.90E-03               | 360.3766                                       | 1.5160                | 1.81E-03               |
| 20   | 724.7406                                       | 6.7690E-02                                 | 1.5210 | 726.7283                                         | 1.5221                  | 1.07E-03               | 725.6199                                       | 1.5211                | 1.19E-04               |
| 30   | 1084.6637                                      | 4.5151E-02                                 | 1.5200 | 1091.2683                                        | 1.5231                  | 3.14E-03               | 1090.8632                                      | 1.5229                | 2.91E-03               |
| 40   | 1456.4855                                      | 3.3872E-02                                 | 1.5245 | 1455.8083                                        | 1.5236                  | 9.29E-04               | 1456.1065                                      | 1.5237                | 8.01E-04               |
| 50   | 1825.0084                                      | 2.7102E-02                                 | 1.5262 | 1820.3483                                        | 1.5239                  | 2.24E-03               | 1821.3498                                      | 1.5243                | 1.90E-03               |
| 100  | -                                              | -                                          | -      | 3643.0483                                        | 1.5245                  | -                      | 3647.5664                                      | 1.5253                | -                      |
| 200  | -                                              | -                                          | -      | 7288.4483                                        | 1.5248                  | -                      | 7299.9996                                      | 1.5258                | -                      |
| 500  | -                                              | -                                          | -      | 18224.6483                                       | 1.5250                  | -                      | 18257.2991                                     | 1.5261                | -                      |
| 1000 | -                                              | -                                          | -      | 36451.6483                                       | 1.5251                  | -                      | 36519.4649                                     | 1.5262                | -                      |
| 2000 | -                                              | -                                          | -      | 72905.6483                                       | 1.5251                  | -                      | 73043.7965                                     | <b>1.5263</b>         | -                      |

Table S2 Polarizability and refractive index of PVA

| $n$ | $\alpha_{\text{ORCA}}$<br>(bohr <sup>3</sup> ) | $N$<br>( $\times 10^{28} \text{ m}^{-3}$ ) | $n_r$  | $\alpha_{\text{linear}}$<br>(bohr <sup>3</sup> ) | $n_{r_{\text{linear}}}$ | Relative<br>difference | $\alpha_{\text{PPFS}}$<br>(bohr <sup>3</sup> ) | $n_{r_{\text{PPFS}}}$ | Relative<br>difference |
|-----|------------------------------------------------|--------------------------------------------|--------|--------------------------------------------------|-------------------------|------------------------|------------------------------------------------|-----------------------|------------------------|
| 1   | 31.1022                                        | 1.6680E+00                                 | 1.5565 | 30.8581                                          | 1.5512                  | 5.28E-03               | 31.1023                                        | 1.5565                | 2.41E-06               |
| 2   | 58.1392                                        | 8.5267E-01                                 | 1.5269 | 59.1841                                          | 1.5383                  | 1.14E-02               | 58.1392                                        | 1.5269                | 1.25E-07               |
| 3   | 86.1717                                        | 5.7273E-01                                 | 1.5241 | 87.5101                                          | 1.5339                  | 9.75E-03               | 86.1717                                        | 1.5241                | 1.21E-07               |
| 4   | 113.5730                                       | 4.3114E-01                                 | 1.5192 | 115.8361                                         | 1.5316                  | 1.24E-02               | 116.5584                                       | 1.5356                | 1.64E-02               |
| 5   | 142.6223                                       | 3.4570E-01                                 | 1.5235 | 144.1621                                         | 1.5303                  | 6.76E-03               | 144.8626                                       | 1.5334                | 9.85E-03               |
| 10  | 290.6891                                       | 1.7364E-01                                 | 1.5384 | 285.7921                                         | 1.5276                  | 1.08E-02               | 286.3835                                       | 1.5289                | 9.54E-03               |
| 20  | 571.7931                                       | 8.7018E-02                                 | 1.5293 | 569.0521                                         | 1.5262                  | 3.03E-03               | 569.4253                                       | 1.5266                | 2.62E-03               |

|      |           |            |        |            |        |          |            |               |          |
|------|-----------|------------|--------|------------|--------|----------|------------|---------------|----------|
| 30   | 852.6270  | 5.8056E-02 | 1.5260 | 852.3121   | 1.5258 | 2.32E-04 | 852.4671   | 1.5259        | 1.18E-04 |
| 40   | 1134.6769 | 4.3559E-02 | 1.5250 | 1135.5721  | 1.5255 | 4.95E-04 | 1135.5089  | 1.5255        | 4.60E-04 |
| 50   | 1417.7750 | 3.4855E-02 | 1.5249 | 1418.8321  | 1.5254 | 4.67E-04 | 1418.5507  | 1.5253        | 3.43E-04 |
| 100  | -         | -          | -      | 2835.1321  | 1.5251 | -        | 2833.7597  | 1.5248        | -        |
| 200  | -         | -          | -      | 5667.7321  | 1.5250 | -        | 5664.1776  | 1.5246        | -        |
| 500  | -         | -          | -      | 14165.5321 | 1.5249 | -        | 14155.4314 | 1.5245        | -        |
| 1000 | -         | -          | -      | 28328.5321 | 1.5249 | -        | 28307.5212 | 1.5244        | -        |
| 2000 | -         | -          | -      | 56654.5321 | 1.5249 | -        | 56611.7006 | <b>1.5244</b> | -        |

Table S3 Polarizability and refractive index of PLA

| $n$  | $\alpha_{\text{ORCA}}$<br>(bohr <sup>3</sup> ) | $N$<br>( $\times 10^{28} \text{ m}^{-3}$ ) | $n_r$  | $\alpha_{\text{linear}}$<br>(bohr <sup>3</sup> ) | $n_{r_{\text{linear}}}$ | Relative<br>difference | $\alpha_{\text{PPFS}}$<br>(bohr <sup>3</sup> ) | $n_{r_{\text{PPFS}}}$ | Relative<br>difference |
|------|------------------------------------------------|--------------------------------------------|--------|--------------------------------------------------|-------------------------|------------------------|------------------------------------------------|-----------------------|------------------------|
| 1    | 43.9342                                        | 1.0269E+00                                 | 1.4715 | 42.9273                                          | 1.4589                  | 1.25E-02               | 43.9342                                        | 1.4715                | 1.95E-07               |
| 2    | 84.3933                                        | 5.2052E-01                                 | 1.4571 | 83.5613                                          | 1.4519                  | 5.21E-03               | 84.3933                                        | 1.4571                | 1.41E-07               |
| 3    | 125.4478                                       | 3.4862E-01                                 | 1.4547 | 124.1953                                         | 1.4495                  | 5.25E-03               | 125.4478                                       | 1.4547                | 1.41E-09               |
| 4    | 163.4898                                       | 2.6206E-01                                 | 1.4441 | 164.8293                                         | 1.4483                  | 4.20E-03               | 163.6471                                       | 1.4446                | 4.93E-04               |
| 5    | 205.8237                                       | 2.0994E-01                                 | 1.4485 | 205.4633                                         | 1.4476                  | 9.06E-04               | 204.3275                                       | 1.4447                | 3.76E-03               |
| 10   | 407.4819                                       | 1.0527E-01                                 | 1.4447 | 408.6333                                         | 1.4461                  | 1.45E-03               | 407.7298                                       | 1.4450                | 3.12E-04               |
| 20   | 817.4324                                       | 5.2706E-02                                 | 1.4469 | 814.9733                                         | 1.4454                  | 1.55E-03               | 814.5343                                       | 1.4451                | 1.83E-03               |
| 30   | 1211.6159                                      | 3.5154E-02                                 | 1.4411 | 1221.3133                                        | 1.4452                  | 4.07E-03               | 1221.3388                                      | 1.4452                | 4.08E-03               |
| 40   | 1633.8771                                      | 2.6372E-02                                 | 1.4470 | 1627.6533                                        | 1.4450                  | 1.96E-03               | 1628.1433                                      | 1.4452                | 1.81E-03               |
| 100  | -                                              | -                                          | -      | 4065.6933                                        | 1.4447                  | -                      | 4068.9703                                      | 1.4452                | -                      |
| 200  | -                                              | -                                          | -      | 8129.0933                                        | 1.4447                  | -                      | 8137.0154                                      | 1.4452                | -                      |
| 500  | -                                              | -                                          | -      | 20319.2933                                       | 1.4447                  | -                      | 20341.1505                                     | 1.4452                | -                      |
| 1000 | -                                              | -                                          | -      | 40636.2933                                       | 1.4447                  | -                      | 40681.3756                                     | 1.4452                | -                      |
| 2000 | -                                              | -                                          | -      | 81270.2933                                       | 1.4447                  | -                      | 81361.8260                                     | <b>1.4452</b>         | -                      |
